# Supplementary material for: The surprisingly beneficial effect of soft donors on the performance of early transition metal olefin polymerisation catalysts
Source: Royal Society of Chemistry journal article supplement (doi:10.1039/b409870f), 2004-01-01
Supplement: b409870f.pdf [file b409870f.pdf]

## The Surprisingly Beneficial Effect of Soft Donors on the Performance of Early Transition Metal Olefin Polymerisation Catalysts

Daniel C. H. Oakes, Brian S. Kimberley, Vernon C. Gibson,\*† David J. Jones, Andrew J. P. White and David J. Williams

*a*Department of Chemistry, Imperial College London, Exhibition Road, London, UK, SW7 2AZ.  
Fax: 020 7594 5810; Tel: 020 7594 5830; E-mail: v.gibson@imperial.ac.uk

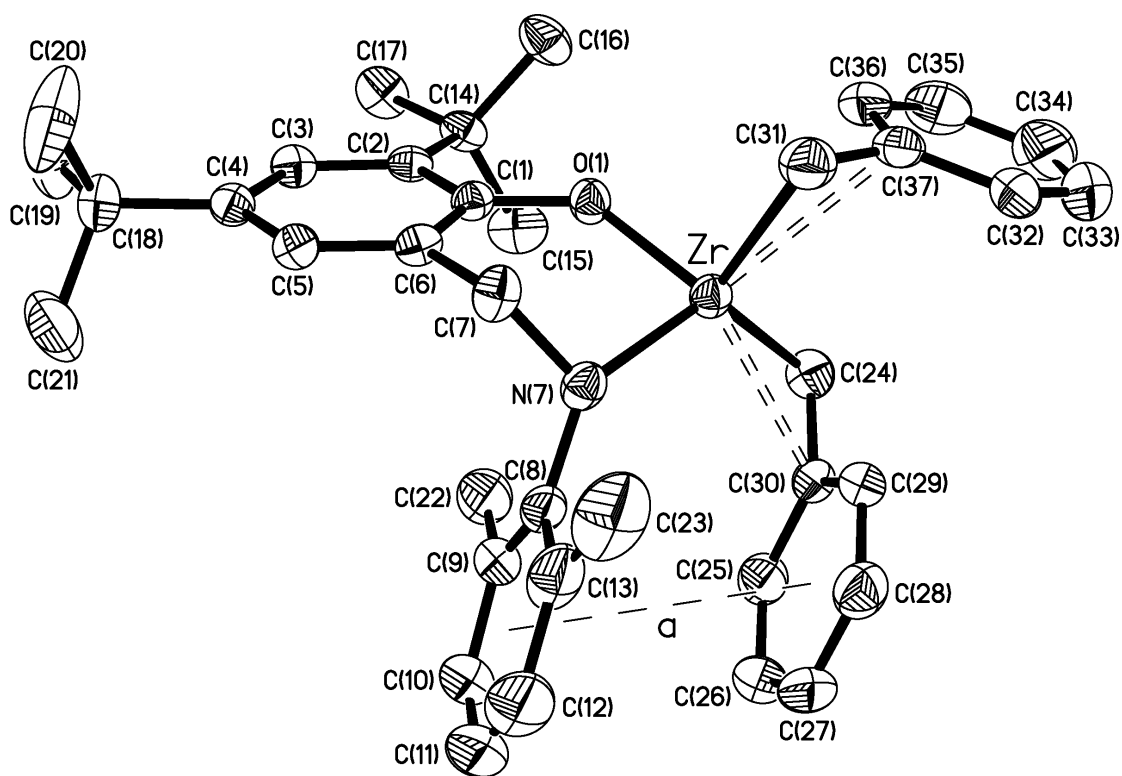

**Figure S1** The molecular structure of **2**.

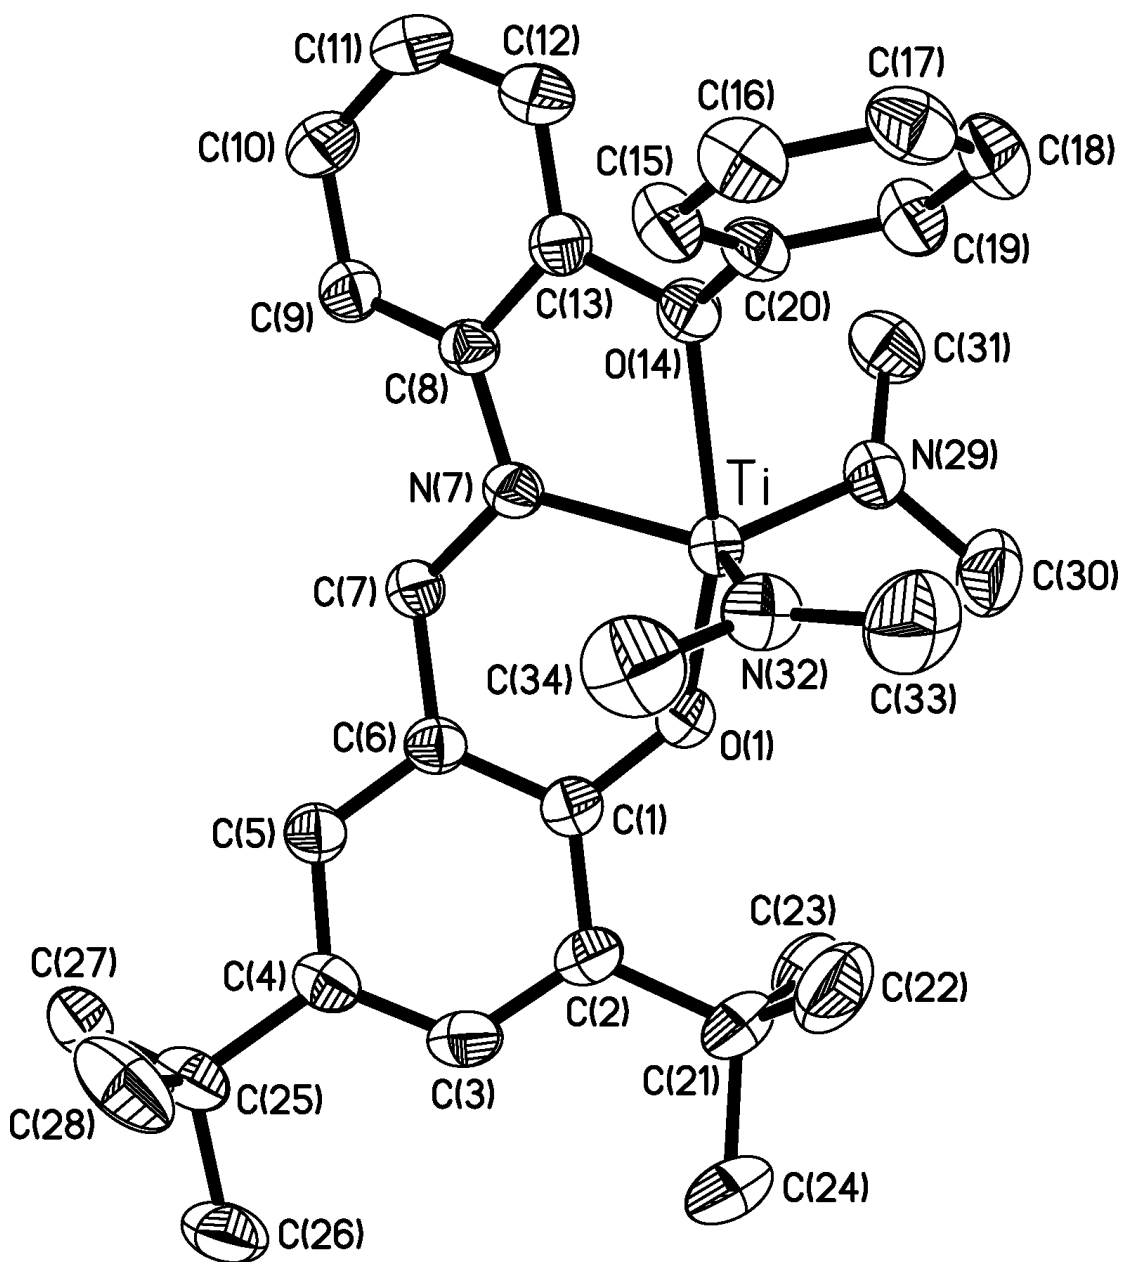

**Figure S2** The molecular structure of **3b**.
